# Supplementary material for: Plant cysteine oxidases control the oxygen-dependent branch of the N-end-rule pathway
Source: PubMed Central journal article supplement — Nat Commun. 2014 Mar 6;5:3425. doi: 10.1038/ncomms4425 (PMC3959200; doi:10.1038/ncomms4425), 2014-03-06
Supplement: ncomms4425-s1.pdf [file ncomms4425-s1.pdf]

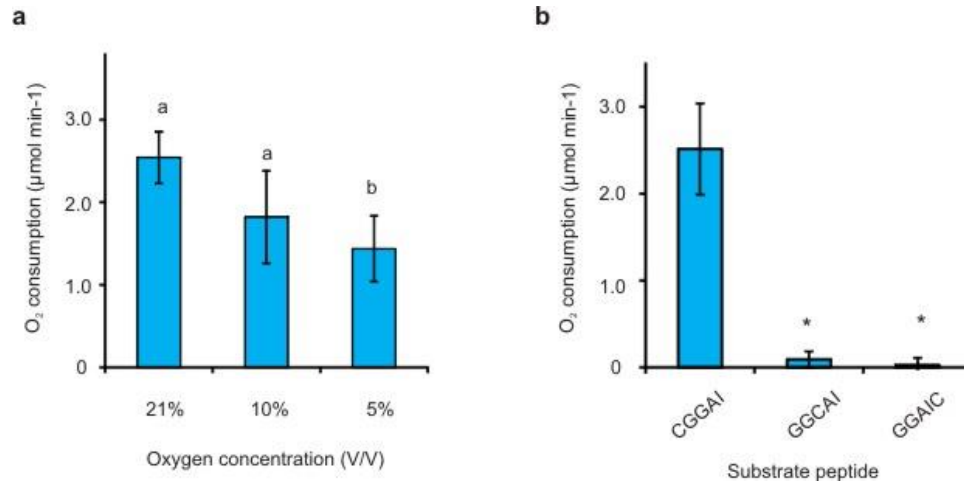

**Supplementary Figure 2. Biochemical properties of the PCO1 enzyme. (a)** Oxygen consumption rate and position specificity of PCO1 at different oxygen concentrations. A purified PCO1 protein was incubated with a CGGAI pentapeptide as the substrate and in presence of co-factors as described in the Materials and Methods section. The oxygen level in the solution was adjusted by flushing a gas mixture at the desired O<sub>2</sub> concentration. The oxygen tension was monitored by an optical phosphorescent sensor (Presens, Germany). Data are presented as mean  $\pm$  s.d. (n = 4) Letters indicate statistically significant difference (P<0.05, one-way ANOVA). **(b)** Oxygen consumption by PCO1 incubated with three pentapeptides differing for the position of a Cys residue: CGGAI, GGCAI or GGAIC. Data are presented as mean  $\pm$  s.d. (n = 4). Asterisks indicate statistically significant difference (P<0.05, one-way ANOVA).

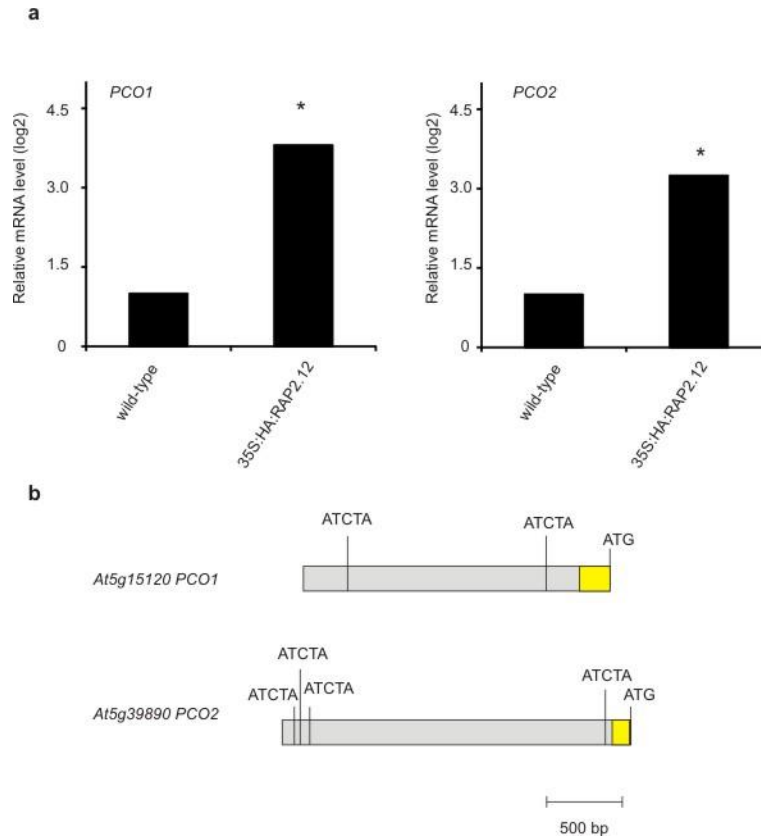

**Supplementary Figure 3. *PCO1* and *PCO2* are targets of *RAP2.12*.** (a) Relative mRNA level of *PCO1* (*At5g15120*) and *PCO2* (*At5g39890*) in leaves of wild-type and *35S:HA:RAP2.12* plants. These transgenic plants carry a chimeric version of the anaerobic activator *RAP2.12* that is stabilized independently of the oxygen concentration, as the Cys in penultimate position is shifted by 18 positions due to the insertion of an N-terminal HA-epitope followed by a gateway linker. Both *PCO1* and *PCO2* are up-regulated as consequence of *RAP2.12* stabilization. Data are obtained from the microarray dataset deposited at the Gene Expression Omnibus database (<http://www.ncbi.nlm.nih.gov/geo>; accession number: [GSE29187](https://www.ncbi.nlm.nih.gov/geo/query/acc.cgi?acc=GSE29187)). \*adj.  $P < 0.05$  (with a Benjamini–Hochberg P-value correction). (b) Relative position of ATCTA elements, a DNA element putatively recognized by *RAP2.12*<sup>2</sup>, is shown in the upstream sequence of *PCO1* and *PCO2* (gray: intergenic region, yellow: untranslated region)

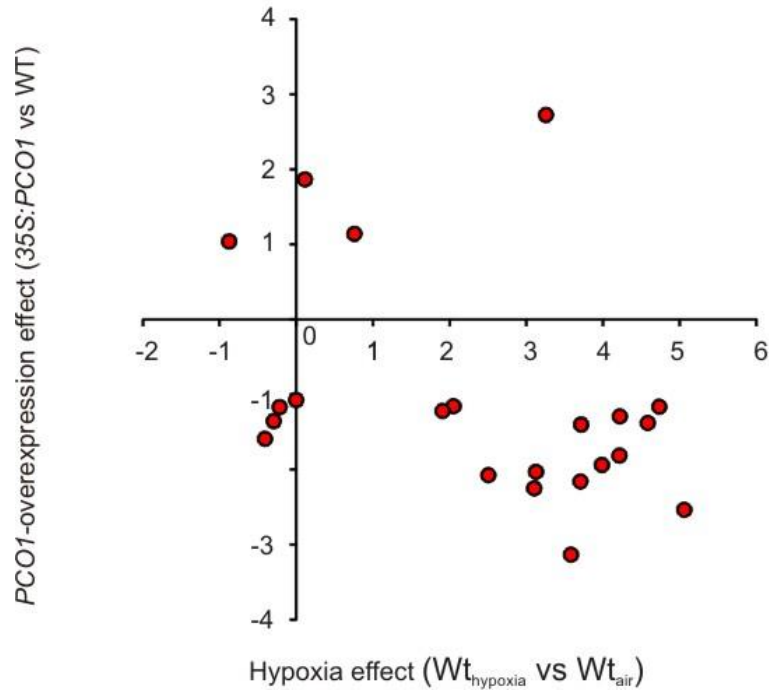

**Supplementary Figure 4. Correlation between differential gene expression as induced in wild-type plants by hypoxia and overexpression of *PCO1* in hypoxia.** Microarray comparison of wild type plants treated with hypoxia (control treatment: wild-type plants in air, average of all the experiments carried out with hypoxic conditions present in the Genvestigator<sup>3</sup> database) and constitutive overexpression of *PCO1* in hypoxia (*PCO1* hypoxia: wild-type hypoxia). Red dots represent genes that are significantly (adj. P-value<0.05) up- or downregulated by *PCO1* overexpression. A full list of the differentially expressed genes is provided in Supplementary Table 4. The raw data of the microarrays can be downloaded from the Gene Expression Omnibus database (<http://www.ncbi.nlm.nih.gov/geo>; accession number: GSE44343).

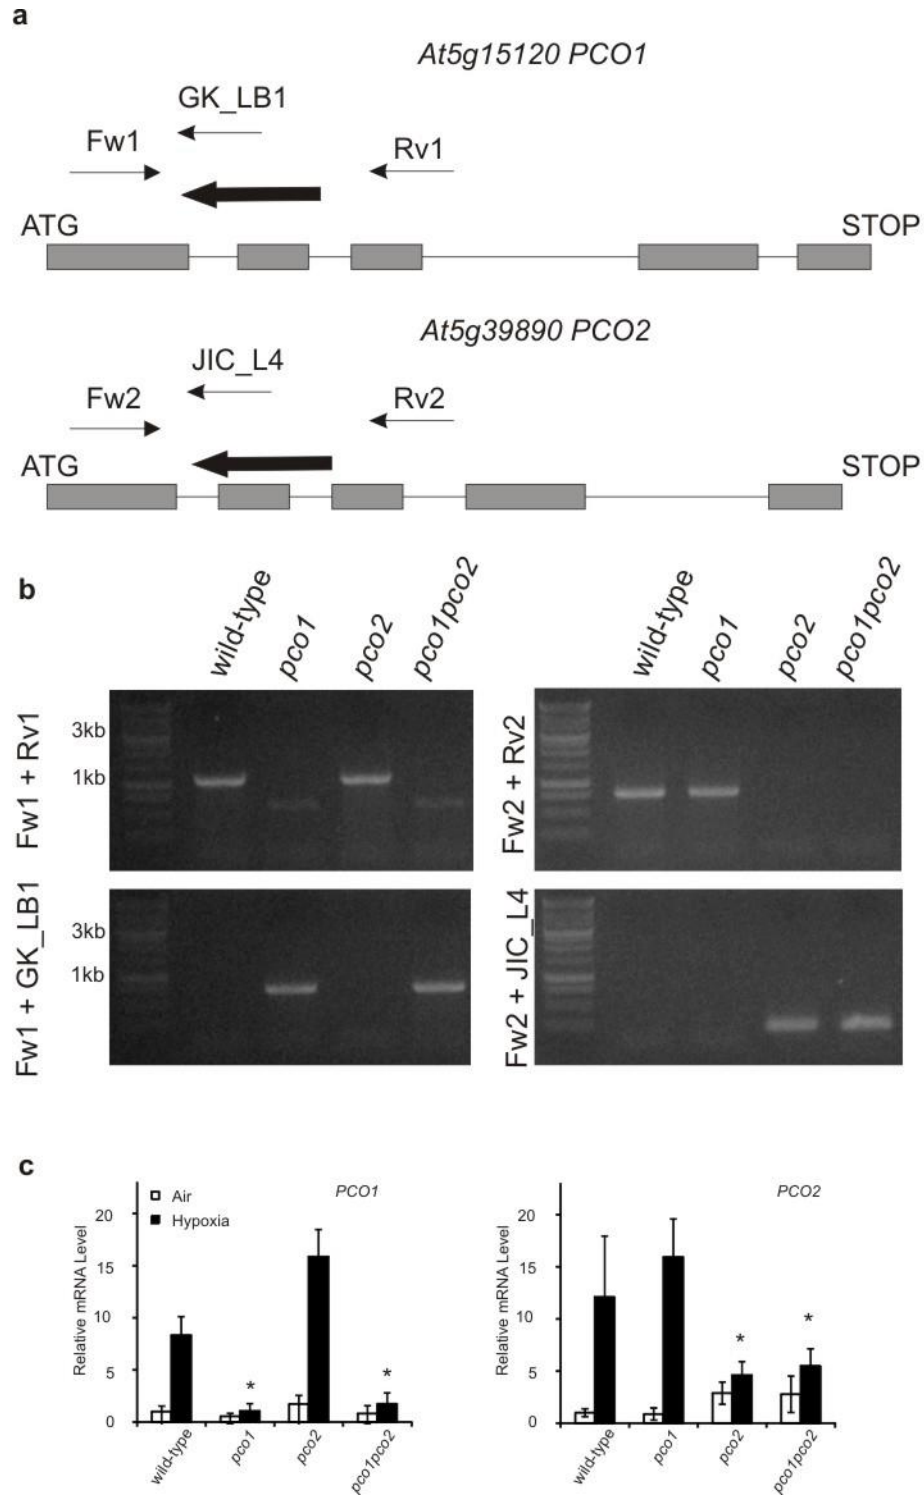

**Supplementary Figure 5. Genotypization of *pco1*, *pco2* and *pco1pco2* double mutants. (a)**

Position of the insert of the *pco1* and *pco2* T-DNA insertion lines and the location of the

annealing sequence of the primers used in PCR. (b) The result of a PCR screening is displayed,

as analyzed using gel electrophoresis. (c) mRNA levels of *PCO1* (left) and *PCO2* (right) in wild-type, *pco1* (N451210), *pco2* (N116554) and *pco1pco2* double knock-out mutants under aerobic and hypoxic (5% O<sub>2</sub>, 3h) is shown. Data are presented as mean  $\pm$  s.d. (n=4) and referred to the aerobic wild-type samples (wt, air = 1), \*P<0.05, two-way ANOVA.

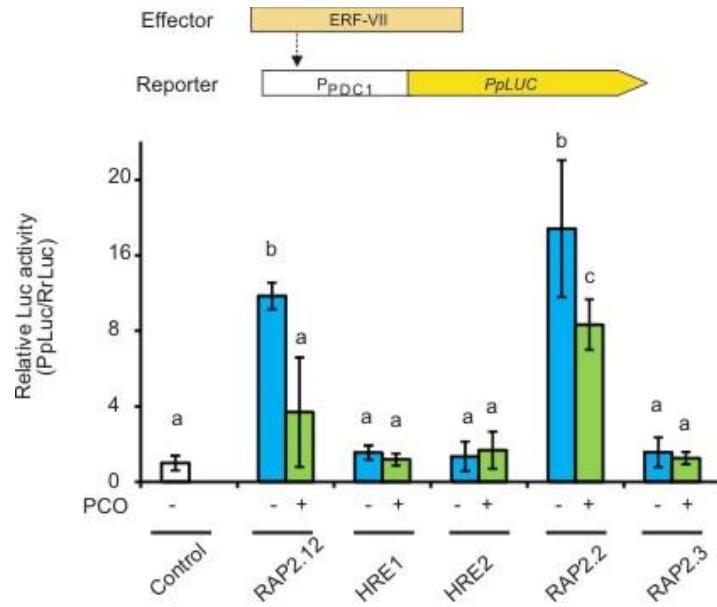

**Supplementary Figure 6. Transactivation assay investigating the effect of PCO on ERF-VII mediated activation of the *PDC1* promoter driving expression of *Photinus pyralis* Luciferase (*PpLuc*).** PCO reduced the transactivation activity of RAP2.12 and RAP2.2 on the *PDC1* promoter, but had no effect on HRE1, HRE2 and RAP2.3. Differently from RAP2.2 and RAP2.12, the hypoxia responsive ERFs (HRE1 and HRE2<sup>4</sup>) and RAP2.3 could not alter significantly the expression of the reporter gene, suggesting that either the HREs and RAP2.3 are more sensitive to the N-end rule mediated degradation or their activity is lower than the one of RAP2.2 and RAP2.12. Values are expressed relatively to the Control, set as 1. Data are presented as mean  $\pm$  s.d. (n=4), letters indicate statistically significant significance P<0.05, one-way ANOVA.

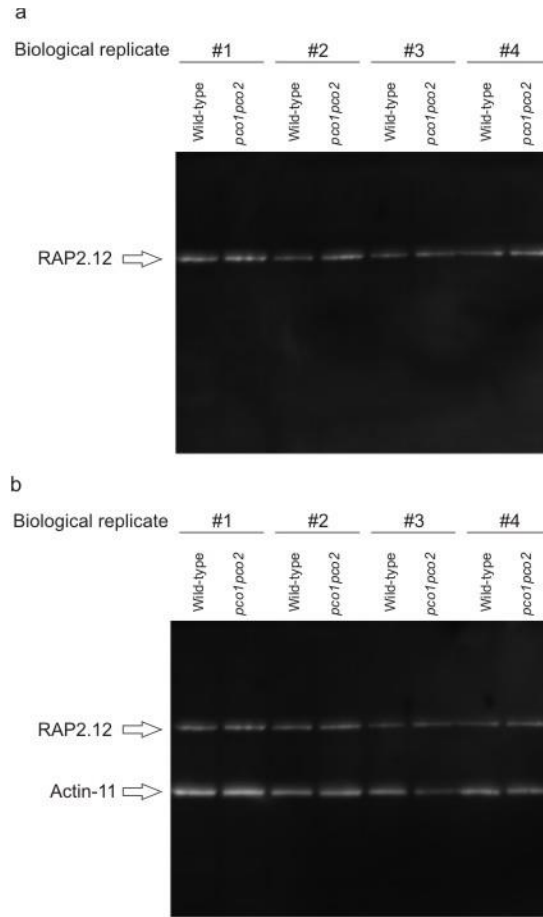

**Supplementary Figure 7. Original blots from which portions are shown in figure 5d. (a)** Immunodetection of the RAP2.12 protein in wild-type and *pcol/pco2* plants using a polyclonal anti-RAP2.12 antibody, as indicated by the white arrow. The band corresponding to RAP2.12 has an apparent molecular mass of about 65 kD, whereas the calculated molecular mass of AtRAP2.12 is only 39.8 kD. This discrepancy is in agreement with what observed for RAP2.2 by Welsh et al. <sup>5</sup>**(b)** Immunodetection of Actin-11 using a monoclonal antibody. Four biological independent replicates for each genotype were tested. The second biological replicate was used as representative examples in Figure 5d.



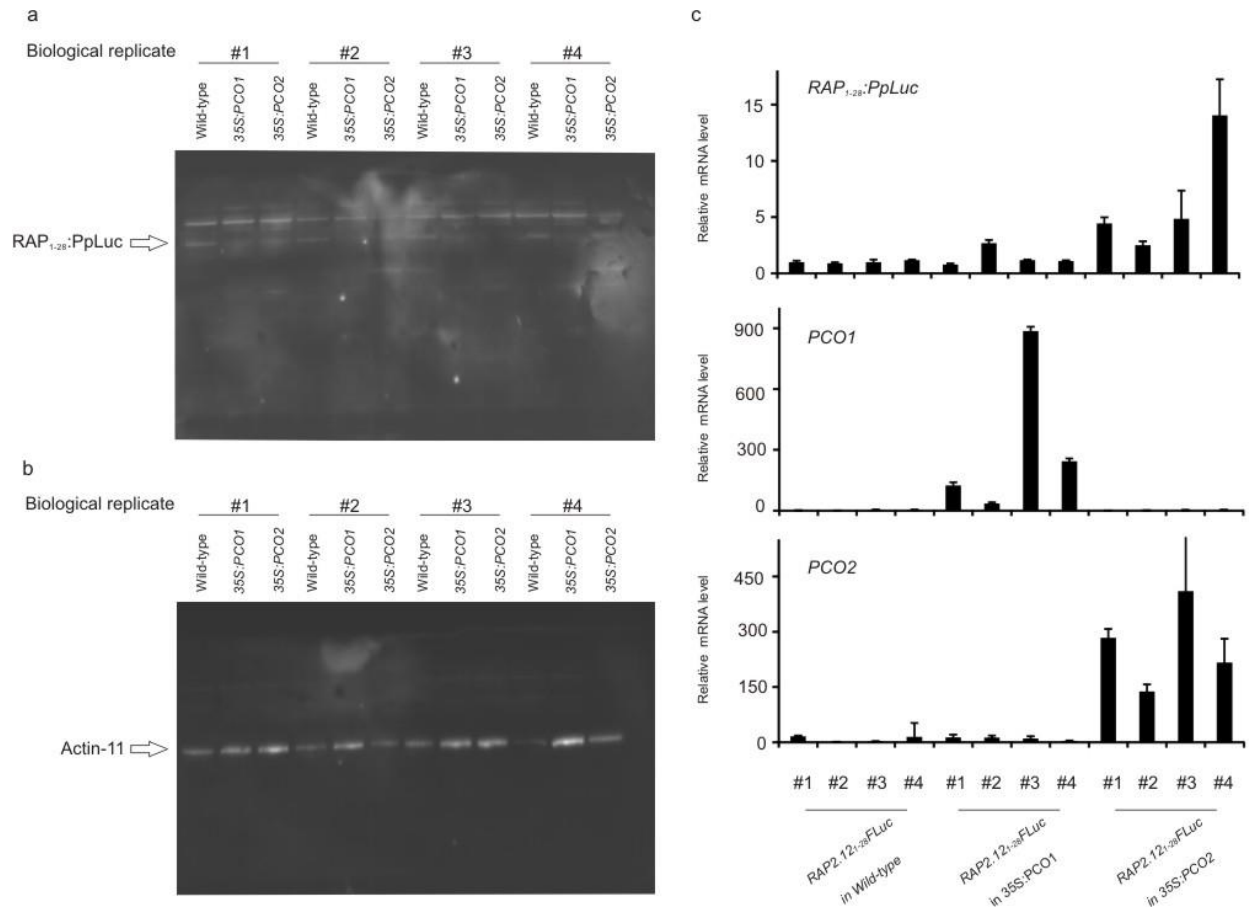

**Supplementary Figure 8. Original blots from which portions are shown in figure 5f. (a)** Immunodetection of the RAP<sub>1-28</sub>:PpLuc protein stably expressed in wild-type, 35S:PCO1 and 35S:PCO2 plants using a polyclonal anti-PpLuc antibody, as indicated by the white arrow. **(b)** Immunodetection of Actin-11 using a monoclonal antibody. Four biological independent replicates (#1-#4) were tested. The first biological replicate was used as representative examples in Figure 5f. **(c)** mRNA levels of *RAP2.12*<sub>1-28</sub> *FLuc*, *PCO1* and *PCO2* in wild-type and 35S:PCO plants transformed with 35S:*RAP2.12*<sub>1-28</sub> *FLuc*. Data are presented as mean ± s.d. (n=3) and referred to the first *RAP2.12*<sub>1-28</sub> *FLuc* in wild-type sample.

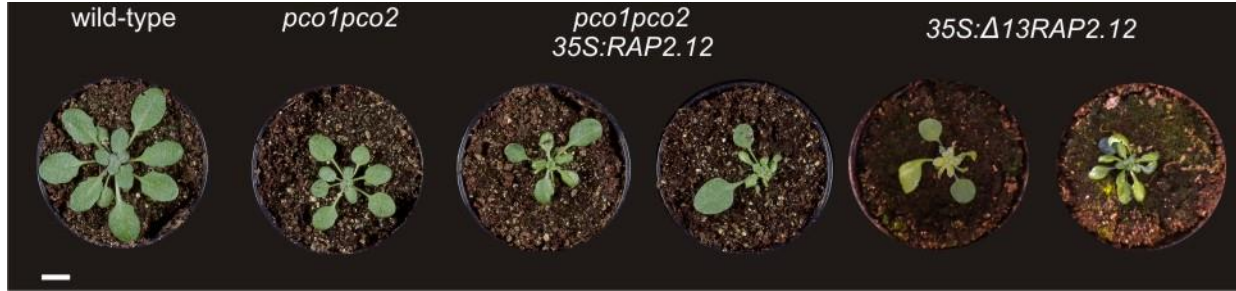

**Supplementary Figure 9. Phenotypic alteration caused by *RAP2.12* overexpression in a *pco1pco2* mutant.** Phenotypes caused by the ectopic expression of a wild-type version of *RAP2.12* in the *pco1pco2* double mutant and its comparison with those due to ectopic expression of a stabilized version of *RAP2.12*<sup>2</sup> (obtained by deletion of the first 13 amino acid) and *pco1pco2* double mutants. In *pco1pco2* plants supertransformed with *35S:RAP2.12* growth is delayed, leaf size and number is decreased, and leaves tend to bend laterally, similar to what was observed in *35S:Δ13RAP2.12* plants.

## Supplementary Tables

|                     |                      | AGI code         |                  |                  |                  |                  |
|---------------------|----------------------|------------------|------------------|------------------|------------------|------------------|
|                     |                      | <i>AT5G15120</i> | <i>AT5G39890</i> | <i>AT1G18490</i> | <i>AT2G42670</i> | <i>AT3G58670</i> |
|                     |                      | <i>PCO1</i>      | <i>PCO2</i>      | <i>PCO3</i>      | <i>PCO4</i>      | <i>PCO5</i>      |
| Developmental stage | germinated seed      | 12.60            | 12.02            | 11.10            | 10.50            | 11.40            |
|                     | seedling             | 10.94            | 10.54            | 10.97            | 10.40            | 11.02            |
|                     | young rosette        | 10.37            | 9.96             | 10.95            | 10.41            | 10.64            |
|                     | developed rosette    | 9.48             | 9.34             | 11.25            | 10.62            | 11.00            |
|                     | bolting              | 10.77            | 10.27            | 11.24            | 10.61            | 10.75            |
|                     | young flower         | 9.80             | 9.45             | 11.08            | 10.60            | 10.75            |
|                     | developed flower     | 10.16            | 9.71             | 11.18            | 10.48            | 10.91            |
|                     | flowers and siliques | 10.02            | 9.58             | 11.16            | 10.77            | 10.72            |
|                     | mature siliques      | 12.02            | 12.36            | 11.47            | 10.31            | 10.68            |
|                     | senescence           | 10.92            | 11.32            | 12.20            | 10.76            | 12.33            |

**Supplementary Table 1. *PCO* mRNA is high throughout the entire plant's lifecycle.** The average mRNA abundance of *PCO1* (*At5g15120*), *PCO2* (*At5g39890*), *PCO3* (*At1g18490*), *PCO4* (*At2g42670*) and *PCO5* (*At3g58670*), expressed in log<sub>2</sub> scale, was measured in various tissues and at different developmental stages using Affymetrix ATH1:22K microarrays. Data were retrieved from the Genevestigator webtool<sup>3</sup> on March 11th, 2013.

| Affy ID   | AGI ID           | Annotation                         | FC in air        |           |                |              |
|-----------|------------------|------------------------------------|------------------|-----------|----------------|--------------|
|           |                  |                                    | (35S:PCO1 VS WT) | adj.P Val | Hypoxia effect | Germination  |
| 250152_at | <i>At5g15120</i> | PCO1                               | 22.69            | 0.00      | <b>9.06</b>    | 0.17         |
| 262719_at | <i>At1g43590</i> | Transposable element gene          | 3.51             | 0.00      | 1.05           | 0.61         |
| 260181_at | <i>At1g70710</i> | Glycosyl hydrolase 9B1             | 0.49             | 0.01      | 0.86           | <b>5.75</b>  |
| 247151_at | <i>At5g65640</i> | beta HLH protein 93                | 0.49             | 0.01      | <b>2.08</b>    | 1.91         |
| 255149_at | <i>At4g08150</i> | KNOTTED-like 1                     | 0.48             | 0.05      | 0.89           | <b>3.73</b>  |
| 264953_at | <i>At1g77120</i> | Alcohol dehydrogenase 1            | 0.48             | 0.00      | <b>15.55</b>   | 0.11         |
| 263096_at | <i>At2g16060</i> | Hemoglobin 1                       | 0.48             | 0.03      | <b>8.09</b>    | 0.21         |
| 251886_at | <i>At3g54260</i> | TRICHOME BIREFRINGENCE-LIKE<br>36  | 0.46             | 0.02      | 1.04           | 1.69         |
| 266223_at | <i>At2g28790</i> | Pathogenesis-related thaumatin     | 0.45             | 0.02      | 0.85           | 0.61         |
| 260869_at | <i>At1g43800</i> | Plant stearyl-acyl-carrier-protein | 0.44             | 0.04      | <b>11.97</b>   | <b>20.13</b> |
| 252612_at | <i>At3g45160</i> | Putative membrane lipoprotein      | 0.44             | 0.03      | 1.20           | 1.45         |
| 257066_at | <i>At3g18280</i> | Seed storage 2S albumin            | 0.44             | 0.02      | 1.02           | <b>10.75</b> |
| 261826_at | <i>At1g11580</i> | Methylesterase PCR A               | 0.40             | 0.00      | <b>2.25</b>    | <b>2.26</b>  |
| 258487_at | <i>At3g02550</i> | LOB domain-containing protein 41   | 0.39             | 0.01      | <b>12.61</b>   | 1.01         |
| 245688_at | <i>At1g28290</i> | Arabinogalactan protein 31         | 0.39             | 0.01      | 0.94           | <b>48.48</b> |

|           |                  |                                 |      |      |             |              |
|-----------|------------------|---------------------------------|------|------|-------------|--------------|
| 261335_at | <i>At1g44800</i> | Nodulin MtN21                   | 0.39 | 0.03 | 0.69        | <b>17.04</b> |
| 265588_at | <i>At2g19970</i> | Cysteine-rich secretory protein | 0.37 | 0.02 | 0.91        | 1.12         |
| 265948_at | <i>At2g19590</i> | ACC oxidase 1                   | 0.35 | 0.04 | <b>5.87</b> | <b>12.81</b> |
| 255517_at | <i>At4g02290</i> | Glycosyl hydrolase 9B13         | 0.32 | 0.01 | 0.87        | <b>2.29</b>  |
| 257952_at | <i>At3g21770</i> | Peroxidase superfamily protein  | 0.29 | 0.02 | 0.86        | <b>18.82</b> |
| 265117_at | <i>At1g62500</i> | Seed storage 2S albumin         | 0.16 | 0.01 | 0.89        | <b>2.17</b>  |

---

**Supplementary Table 2.** List of genes that are differentially regulated by PCO1 overexpression in air and the effect of hypoxia on their expression in wild-type plants. The “Hypoxia-effect” value is calculated as the average of the effect caused by the treatment defined as “hypoxia” in the Genevestigator database<sup>3</sup> on March 11<sup>th</sup> 2013. The “Germination effect” value is the difference in expression of displayed genes in the comparison 24h germination against desiccation downloaded from the Genevestigator database<sup>3</sup> on March 11<sup>th</sup> 2013.

|                       | Number of differentially expressed genes<br>(35S:PCO1 vs Wildtype) | % differentially expressed genes<br>(35S:PCO1 vs Wildtype) |
|-----------------------|--------------------------------------------------------------------|------------------------------------------------------------|
| Total                 | 21                                                                 | 100%                                                       |
| Up-regulated          | 2                                                                  | 10%                                                        |
| Down-regulated        | 19                                                                 | 90%                                                        |
| Hypoxia induced       | 8                                                                  | 38%                                                        |
| Germination induced   | 11                                                                 | 52%                                                        |
| Hypoxia & Germination | 3                                                                  | 14%                                                        |

**Supplementary Table 3.** Absolute and relative number of genes that are differentially regulated by overexpressing PCO1 in air and the effect of hypoxia and germination on their expression. The hypoxia effect is calculated as average of the effect caused by treatment defined as “hypoxia” in the Genevestigator database<sup>3</sup> on March 11<sup>th</sup> 2013. The “Germination effect” value is the difference in expression of displayed genes in the comparison 24h germination against desiccation downloaded from the Genevestigator database<sup>3</sup> on March 11<sup>th</sup> 2013.

| <b>ID</b> | <b>AGI ID</b> | <b>Annotation</b>                                                     | <b>FC in hypoxia<br/>(35S:PCO1 VS<br/>WT)</b> | <b>adj.P Val</b> | <b>Hypoxia<br/>effect</b> |
|-----------|---------------|-----------------------------------------------------------------------|-----------------------------------------------|------------------|---------------------------|
| 250152_at | At5g15120     | Protein of unknown function (DUF1637)                                 | 6.60                                          | 0.00             | <b>9.57</b>               |
| 262719_at | At1g43590     | Transposable element gene                                             | 3.63                                          | 0.04             | 1.08                      |
| 259037_at | At3g09350     | Fes1A                                                                 | 2.20                                          | 0.01             | 1.70                      |
| 245325_at | At4g14130     | Xyloglucanendotransglucosylase/hydrolase 15                           | 2.05                                          | 0.02             | 0.55                      |
| 247224_at | At5g65080     | AGL68 MAF5 MADS-box transcription factor                              | 0.47                                          | 0.01             | 1.00                      |
| 253404_at | At4g32840     | Phosphofructokinase 6                                                 | 0.45                                          | 0.00             | <b>4.16</b>               |
| 253416_at | At4g33070     | Pyruvate decarboxylase 1                                              | 0.45                                          | 0.00             | <b>26.69</b>              |
| 251065_at | At5g01870     | Bifunctional inhibitor/lipid-transfer protein/seed storage 2S albumin | 0.44                                          | 0.01             | 0.86                      |
| 245951_at | At5g19550     | Aspartate aminotransferase 2                                          | 0.43                                          | 0.00             | <b>3.76</b>               |
| 259879_at | At1g76650     | Calmodulin-like 38                                                    | 0.41                                          | 0.00             | <b>18.66</b>              |
| 265117_at | At1g62500     | Bifunctional inhibitor/lipid-transfer protein/seed storage 2S albumin | 0.39                                          | 0.00             | 0.82                      |
| 258930_at | At3g10040     | sequence-specific DNA binding transcription factors                   | 0.38                                          | 0.00             | <b>24.00</b>              |
| 257153_at | At3g27220     | Galactose oxidase                                                     | 0.38                                          | 0.00             | <b>13.16</b>              |
| 254327_at | At4g22490     | Bifunctional inhibitor/lipid-transfer protein/seed storage 2S albumin | 0.33                                          | 0.01             | 0.75                      |
| 264846_at | At2g17850     | Rhodanese/Cell cycle control phosphatase                              | 0.28                                          | 0.01             | <b>18.59</b>              |
| 264953_at | At1g77120     | Alcohol dehydrogenase 1                                               | 0.26                                          | 0.00             | <b>15.89</b>              |

|           |           |                                                |      |      |              |
|-----------|-----------|------------------------------------------------|------|------|--------------|
| 261567_at | At1g33055 | unknown protein                                | 0.24 | 0.00 | <b>8.76</b>  |
| 260668_at | At1g19530 | unknown protein                                | 0.24 | 0.02 | <b>5.68</b>  |
| 258487_at | At3g02550 | LOB domain-containing protein 41               | 0.22 | 0.00 | <b>13.06</b> |
| 263096_at | At2g16060 | Non symbiotic hemoglobin 1                     | 0.21 | 0.00 | <b>8.60</b>  |
| 255807_at | At4g10270 | Wound-responsive family protein                | 0.17 | 0.00 | <b>33.48</b> |
| 260869_at | At1g43800 | Plant stearoyl-acyl-carrier-protein desaturase | 0.11 | 0.00 | <b>11.99</b> |

**Supplementary Table 4.** List of genes that are differentially regulated by PCO1 overexpression under hypoxia (4h, 5% O<sub>2</sub> V/V in air) as compared to wild-type plants and the effect of hypoxia on their expression in wild-type plants. Hypoxia-effect is calculated as average of the effect caused by treatment defined as “hypoxia” in the Genevestigator database<sup>3</sup> on March 11<sup>th</sup> 2013.



| Normoxia         | <i>Wt</i> | <i>35S:PCO1</i> |                |              |                | <i>35S:PCO2</i>      |              |                |                      |
|------------------|-----------|-----------------|----------------|--------------|----------------|----------------------|--------------|----------------|----------------------|
|                  |           |                 |                |              |                | <b>P-</b>            |              | <b>P-</b>      |                      |
|                  |           | <b>Value</b>    | <b>st.Dev.</b> | <b>Value</b> | <b>st.Dev.</b> | <b>value&lt;0.05</b> | <b>Value</b> | <b>st.Dev.</b> | <b>value&lt;0.05</b> |
| <b>PCO1</b>      | 1.00      | 0.33            | 105.89         | 68.01        | yes            | 0.06                 | 0.02         | no             |                      |
| <b>PCO2</b>      | 1.00      | 0.93            | 0.28           | 0.29         | no             | 511.81               | 193.38       | yes            |                      |
| <b>ADH</b>       | 1.00      | 0.31            | 0.44           | 0.15         | no             | 0.47                 | 0.54         | no             |                      |
| <b>HB1</b>       | 1.00      | 0.00            | 0.59           | 0.19         | yes            | 0.49                 | 0.36         | yes            |                      |
| <b>PDC1</b>      | 1.00      | 0.43            | 1.22           | 1.08         | no             | 1.64                 | 0.98         | no             |                      |
| <b>At3g10040</b> | 1.00      | 0.26            | 1.46           | 0.48         | no             | 0.64                 | 0.21         | no             |                      |
| <b>HUP9</b>      | 1.00      | 0.27            | 3.41           | 4.23         | no             | 0.87                 | 0.34         | no             |                      |
| <b>LBD41</b>     | 1.00      | 0.25            | 0.48           | 0.45         | no             | 0.76                 | 0.22         | no             |                      |
| <b>HUP7</b>      | 1.00      | 0.76            | 0.34           | 0.35         | no             | 0.27                 | 0.12         | no             |                      |
| <b>SUS1</b>      | 1.00      | 0.45            | 4.65           | 2.02         | yes            | 0.64                 | 0.44         | no             |                      |
| <b>SUS4</b>      | 1.00      | 0.55            | 3.35           | 2.51         | no             | 0.73                 | 0.37         | no             |                      |
|                  |           |                 |                |              |                |                      |              |                |                      |
| Hypoxia          | <i>Wt</i> | <i>35S:PCO1</i> |                |              |                | <i>35S:PCO2</i>      |              |                |                      |
|                  |           |                 |                |              |                | <b>P-</b>            |              | <b>P-</b>      |                      |
|                  |           | <b>Value</b>    | <b>st.Dev.</b> | <b>Value</b> | <b>st.Dev.</b> | <b>value&lt;0.05</b> | <b>Value</b> | <b>st.Dev.</b> | <b>value&lt;0.05</b> |
| <b>PCO1</b>      | 17.27     | 2.65            | 134.48         | 96.42        | yes            | 1.25                 | 0.62         | no             |                      |
| <b>PCO2</b>      | 6.52      | 1.51            | 0.31           | 0.02         | no             | 1052.21              | 285.23       | yes            |                      |
| <b>ADH</b>       | 22.73     | 5.22            | 1.75           | 1.46         | yes            | 1.79                 | 0.58         | yes            |                      |
| <b>HB1</b>       | 15.91     | 4.95            | 1.40           | 0.97         | yes            | 0.17                 | 0.07         | yes            |                      |
| <b>PDC1</b>      | 27.74     | 7.75            | 4.16           | 2.88         | yes            | 1.93                 | 1.05         | yes            |                      |
| <b>At3g10040</b> | 18.38     | 6.20            | 3.75           | 2.63         | yes            | 4.02                 | 5.35         | yes            |                      |
| <b>HUP9</b>      | 297.37    | 177.13          | 34.13          | 26.83        | yes            | 0.55                 | 0.37         | yes            |                      |
| <b>LBD41</b>     | 31.34     | 4.62            | 1.09           | 0.41         | yes            | 0.38                 | 0.49         | yes            |                      |
| <b>HUP7</b>      | 14.39     | 8.44            | 1.19           | 0.90         | yes            | 0.32                 | 0.26         | yes            |                      |
| <b>SUS1</b>      | 4.06      | 2.20            | 1.96           | 1.72         | no             | 3.05                 | 3.04         | no             |                      |
| <b>SUS4</b>      | 5.25      | 4.03            | 1.00           | 0.77         | yes            | 0.69                 | 0.20         | yes            |                      |

| Anoxia           | <i>Wt</i> |         | <i>35S:PCO1</i> |         |              | <i>35S:PCO2</i> |         |              |
|------------------|-----------|---------|-----------------|---------|--------------|-----------------|---------|--------------|
|                  | Value     | st.Dev. | Value           | st.Dev. | P-value<0.05 | Value           | st.Dev. | P-value<0.05 |
| <b>PCO1</b>      | 41.77     | 2.76    | 24.20           | 15.07   | no           | 44.98           | 9.33    | no           |
| <b>PCO2</b>      | 61.25     | 15.76   | 33.31           | 10.45   | no           | 58.62           | 13.51   | yes          |
| <b>ADH</b>       | 106.76    | 32.80   | 89.96           | 12.08   | no           | 121.51          | 8.33    | no           |
| <b>HB1</b>       | 207.23    | 31.16   | 203.87          | 39.25   | no           | 179.13          | 25.98   | no           |
| <b>PDC1</b>      | 167.13    | 15.96   | 121.09          | 9.82    | no           | 221.75          | 22.20   | no           |
| <b>At3g10040</b> | 28.62     | 3.40    | 34.69           | 7.71    | no           | 32.87           | 7.08    | no           |
| <b>HUP9</b>      | 2951.33   | 534.81  | 2071.19         | 820.78  | no           | 3128.07         | 365.31  | no           |
| <b>LBD41</b>     | 100.63    | 4.94    | 149.09          | 65.65   | no           | 111.66          | 36.72   | no           |
| <b>HUP7</b>      | 10.17     | 2.42    | 16.96           | 5.01    | no           | 17.82           | 5.59    | no           |
| <b>SUS1</b>      | 40.80     | 23.78   | 27.74           | 22.24   | no           | 29.21           | 18.36   | no           |
| <b>SUS4</b>      | 643.72    | 250.13  | 382.29          | 257.03  | no           | 578.46          | 262.76  | no           |

**Supplementary Table 5.** Comparison of the mRNA levels of hypoxia responsive genes in wild-type, *35S:PCO1*, *35S:PCO2* under aerobic conditions and after 4h hypoxia (5% O<sub>2</sub> V/V in air) in the dark. Data are means relative to the reference (WT, air) ± s.d. for n=5 (one-way ANOVA test). Two independent transgenic lines for each construct were used.

|                  | <b>wt</b>    |                | <b><i>ate1ate2</i></b> |                |                        | <b><i>prt6</i></b> |                |                        |
|------------------|--------------|----------------|------------------------|----------------|------------------------|--------------------|----------------|------------------------|
|                  | <b>Value</b> | <b>St.Dev.</b> | <b>Value</b>           | <b>St.Dev.</b> | <b>P-value&lt;0.05</b> | <b>Value</b>       | <b>St.Dev.</b> | <b>P-value&lt;0.05</b> |
| <i>PCO1</i>      | 1.00         | 0.57           | 106.27                 | 61.66          | no                     | 190.38             | 88.41          | yes                    |
| <i>ADH</i>       | 1.00         | 0.35           | 2.08                   | 1.11           | no                     | 2.65               | 0.70           | yes                    |
| <i>HB1</i>       | 1.00         | 0.54           | 5.32                   | 2.20           | yes                    | 7.21               | 2.90           | yes                    |
| <i>PDC1</i>      | 1.00         | 0.53           | 2.72                   | 1.40           | no                     | 2.34               | 1.01           | no                     |
| <i>At3g10040</i> | 1.00         | 0.24           | 3.55                   | 1.41           | yes                    | 4.66               | 1.47           | yes                    |
| <i>LBD41</i>     | 1.00         | 0.17           | 55.33                  | 30.52          | yes                    | 76.52              | 45.63          | yes                    |
| <i>HUP7</i>      | 1.00         | 0.40           | 139.55                 | 62.10          | no                     | 557.26             | 217.12         | yes                    |

  

|                  | <b><i>35S:PCO1</i></b> |                |     | <b><i>35S:PCO1</i></b> |                |                        | <b><i>35S:PCO1</i></b> |                |                        |
|------------------|------------------------|----------------|-----|------------------------|----------------|------------------------|------------------------|----------------|------------------------|
|                  | <b>Value</b>           | <b>St.Dev.</b> |     | <b>Value</b>           | <b>St.Dev.</b> | <b>P-value&lt;0.05</b> | <b>Value</b>           | <b>St.Dev.</b> | <b>P-value&lt;0.05</b> |
| <i>PCO1</i>      | 537.33                 | 176.46         | yes | 199.97                 | 40.18          | yes                    | 251.61                 | 56.82          | yes                    |
| <i>ADH</i>       | 1.25                   | 0.62           | no  | 2.70                   | 0.78           | yes                    | 2.03                   | 0.82           | no                     |
| <i>HB1</i>       | 2.12                   | 1.51           | no  | 6.54                   | 2.14           | yes                    | 3.37                   | 0.53           | no                     |
| <i>PDC1</i>      | 0.94                   | 0.50           | no  | 4.45                   | 1.91           | yes                    | 2.98                   | 2.11           | no                     |
| <i>At3g10040</i> | 1.20                   | 0.36           | no  | 4.01                   | 1.42           | yes                    | 3.31                   | 0.31           | yes                    |
| <i>LBD41</i>     | 1.15                   | 0.68           | no  | 64.12                  | 21.41          | yes                    | 78.02                  | 35.47          | yes                    |
| <i>HUP7</i>      | 2.49                   | 1.95           | no  | 553.45                 | 196.87         | yes                    | 296.85                 | 122.14         | yes                    |

**Supplementary Table 6** Comparison of the mRNA levels of hypoxia responsive genes in wild-type, *prt6*, *ate1ate2*, *35S:PCO1*, *35S:PCO1* in the *ate1ate2* background and *35S:PCO1* in the *prt6* background. Four-week old plants grown in soil were used. Data are means relative to the reference (WT)  $\pm$  s.d. for n=4 (one-way ANOVA test).

## Air

|                  | <b>wt</b>    |                | <b><i>pcol</i></b> |                |                        | <b><i>pco2</i></b> |                |                        | <b><i>pcolpco2</i></b> |                |     |
|------------------|--------------|----------------|--------------------|----------------|------------------------|--------------------|----------------|------------------------|------------------------|----------------|-----|
|                  | <b>Value</b> | <b>st.Dev.</b> | <b>Value</b>       | <b>st.Dev.</b> | <b>P-value&lt;0.05</b> | <b>Value</b>       | <b>st.Dev.</b> | <b>P-value&lt;0.05</b> | <b>Value</b>           | <b>st.Dev.</b> |     |
| <i>PCO1</i>      | 1.00         | 0.53           | 0.54               | 0.28           | no                     | 1.72               | 0.82           | no                     | 0.81                   | 0.75           | no  |
| <i>PCO2</i>      | 1.00         | 0.38           | 0.87               | 0.58           | no                     | 2.87               | 1.06           | yes                    | 2.77                   | 0.87           | yes |
| <i>ADH</i>       | 1.00         | 0.48           | 1.60               | 1.46           | no                     | 2.02               | 1.03           | no                     | 5.32                   | 1.52           | yes |
| <i>HBI</i>       | 1.00         | 0.33           | 1.46               | 2.12           | no                     | 3.71               | 2.30           | no                     | 8.26                   | 0.40           | yes |
| <i>PDC1</i>      | 1.00         | 0.56           | 1.51               | 1.25           | no                     | 3.25               | 2.15           | no                     | 3.85                   | 1.50           | no  |
| <i>At3g10040</i> | 1.00         | 0.20           | 1.71               | 1.28           | no                     | 2.78               | 1.10           | no                     | 9.82                   | 3.85           | yes |
| <i>HUP9</i>      | 1.00         | 0.30           | 1.82               | 0.45           | no                     | 3.00               | 1.38           | no                     | 57.81                  | 36.55          | yes |
| <i>LBD41</i>     | 1.00         | 0.15           | 1.17               | 0.86           | no                     | 1.17               | 0.40           | no                     | 3.75                   | 1.51           | yes |
| <i>HUP7</i>      | 1.00         | 0.81           | 0.87               | 1.48           | no                     | 7.42               | 6.44           | no                     | 16.52                  | 9.20           | yes |
| <i>SUS1</i>      | 1.00         | 0.40           | 0.69               | 0.39           | no                     | 1.18               | 0.66           | no                     | 3.07                   | 0.20           | yes |
| <i>SUS4</i>      | 1.00         | 0.69           | 0.97               | 0.94           | no                     | 1.11               | 0.62           | no                     | 3.53                   | 0.27           | yes |

## Hypoxia

|             | <b>wt</b>    |                | <b><i>pcol</i></b> |                |                        | <b><i>pco2</i></b> |                |                        | <b><i>pcolpco2</i></b> |                |     |
|-------------|--------------|----------------|--------------------|----------------|------------------------|--------------------|----------------|------------------------|------------------------|----------------|-----|
|             | <b>Value</b> | <b>st.Dev.</b> | <b>Value</b>       | <b>st.Dev.</b> | <b>P-value&lt;0.05</b> | <b>Value</b>       | <b>st.Dev.</b> | <b>P-value&lt;0.05</b> | <b>Value</b>           | <b>st.Dev.</b> |     |
| <i>PCO1</i> | 8.33         | 0.21           | 1.05               | 0.71           | yes                    | 15.86              | 2.61           | yes                    | 1.74                   | 1.04           | yes |
| <i>PCO2</i> | 12.10        | 0.48           | 15.94              | 3.65           | no                     | 4.60               | 1.30           | yes                    | 5.49                   | 1.65           | yes |

|                  |        |      |        |       |    |        |       |     |        |        |     |
|------------------|--------|------|--------|-------|----|--------|-------|-----|--------|--------|-----|
| <i>ADH</i>       | 16.71  | 0.39 | 23.47  | 3.47  | no | 29.34  | 11.02 | no  | 57.27  | 20.71  | yes |
| <i>HB1</i>       | 6.56   | 0.16 | 6.70   | 0.89  | no | 6.52   | 2.48  | no  | 8.99   | 3.47   | no  |
| <i>PDC1</i>      | 15.48  | 0.33 | 20.56  | 4.56  | no | 39.53  | 9.86  | yes | 20.71  | 4.47   | no  |
| <i>At3g10040</i> | 11.07  | 0.17 | 20.88  | 3.53  | no | 38.63  | 8.06  | yes | 71.76  | 12.10  | yes |
| <i>HUP9</i>      | 111.85 | 0.35 | 141.27 | 29.08 | no | 216.38 | 69.37 | no  | 258.91 | 103.44 | yes |
| <i>LBD41</i>     | 11.74  | 0.17 | 18.60  | 1.77  | no | 27.30  | 5.43  | yes | 44.59  | 15.09  | yes |
| <i>HUP7</i>      | 22.28  | 0.69 | 24.94  | 7.35  | no | 27.78  | 21.49 | no  | 68.60  | 25.74  | yes |
| <i>SUS1</i>      | 4.27   | 0.36 | 5.01   | 1.10  | no | 5.31   | 2.05  | no  | 7.40   | 2.52   | no  |
| <i>SUS4</i>      | 6.74   | 0.62 | 11.87  | 6.63  | no | 9.49   | 4.30  | no  | 8.90   | 2.96   | no  |

**Supplementary Table 7.** Comparison of the mRNA levels of hypoxia responsive genes in wild-type, *pco1*, *pco2* and double *pco1pco2* ko plants under aerobic conditions and after 4h hypoxia (5% O<sub>2</sub> V/V in air) in the dark. Data are means relative to the reference (WT, air) ± s.d. for n=4 (one-way ANOVA test).

| Final Construct           | Original Destination Vector | Reference         |
|---------------------------|-----------------------------|-------------------|
|                           |                             | Life technologies |
| DEST-PCO1                 | pDEST17                     | manual            |
|                           |                             | Life technologies |
| DEST-PCO2                 | pDEST17                     | manual            |
| 35S:GFP:PCO1              | pK7WGF2                     | 6                 |
| 35S:GFP:PCO2              | pK7WGF2                     | 6                 |
| P <sub>PCO1</sub> :GUSGFP | pKGWFS7                     | 6                 |
| P <sub>PCO2</sub> :GUSGFP | pKGWFS7                     | 6                 |
| 35S:PCO1                  | pEARLEYGATE202              | 7                 |
| 35S:PCO2                  | pEARLEYGATE202              | 7                 |
| 35S:RAP2.12               | p2GW7                       | 6                 |
| P <sub>PDC1</sub> :PpLuc  | pGWL7                       | 8                 |
| small35S:PCO1             | p2GW7                       | 6                 |
| small35S:PCO2             | p2GW7                       | 6                 |
| RAP:G4D                   | p2GW7                       | 6                 |
| (C2A)RAP:G4D              | p2GW7                       | 6                 |
| UAS:PpLuc                 | pGreenII-800Luc             | 9                 |
| RAP $\Delta$ 33:RLuc      | p2GW7                       | 6                 |
| G4D:PCO1                  | p35S-GBD-GW                 | 10                |
| G4D:PCO2                  | p35S-GBD-GW                 | 10                |
| small35S:HRE1             | p2GW7                       | 8                 |
| small35S:HRE2             | p2GW7                       | 8                 |
| small35S:RAP2.2           | p2GW7                       | 6                 |
| small35S:RAP2.3           | p2GW7                       | 6                 |
| small35S:RAP2.12          | p2GW7                       | 6                 |
| small35S:PpLuc            | p2GW7                       | 6                 |
| small35S:RrLuc            | p2GW7                       | 6                 |

**Supplementary Table 8.** Full list of the vectors used with references

| Primer name    | Sequence 5'-->3'                   |
|----------------|------------------------------------|
| ins_PCO1fw     | AATGGTGGTCCTGGTGTATTTC             |
| ins_PCO1rv     | GCAAGGTAACAACGACAAACAA             |
| LB1_GK         | ATATTGACCATCATACTCATTGC            |
| ins_PCO2fw     | TGTTCTTTTGCCCTCTTCTCTC             |
| ins_PCO2rv     | TCCGGGTGATGTACAAATACAA             |
| dspm5          | CGGGATCCGACACTCTTTAATTAAGTACTGACTC |
| gwPCO1fw       | CACCATGGGGTTTGAGATGAAACC           |
| gwPCO1rv       | TCAATCTTCAACCTTTGGGCCT             |
| gwPCO2fw       | CACCATGGGAAGTACAGTTAT              |
| gwPCO2rv       | TCATTCTTTGATGGTTGGTCC              |
| gwPPDC1fw      | CACCCTTGAATTACACTA                 |
| gwPPDC1rv      | GGAAATGGGAAGGTTTGAGTT              |
| gwPPCO1fw      | CACCAAATTTCTTTTAATTTACTATTGATG     |
| gwPPCO1rv      | TCTCTGGTTTCATCTCAAACCCCAT          |
| gwPPCO2fw      | CACCTTTTATCCATTTTTTACAAC           |
| gwPPCO2rv      | CAGACATAACTGTATCAGTTCCCAT          |
| gwRAP2.12fw    | CACCATGTGTGGAGGAGCTATAAT           |
| gwRAP2.12rv    | TCAGAAGACTCCTCCAATCATGGAATG        |
| gwC2ARAP2.12fw | CACCATGGCTGGAGGAGCTATAAT           |
| RAPD33RLUCfw   | AAGAAGAATTTGAAATGGCTTCGAAAGTTTAT   |
| RAPD33RLUCrv   | ATAAACTTTCGAAGCCATTTCAAATTCTTCTT   |
| gwRAP2.3fw     | CACCATGTGTGGCGGTGCTATTAT           |
| gwRAP2.3rv     | TTACTCATACGACGCAATGACATCA          |

**Supplementary Table 9.** List of primers used in this work (fw = forward primer, rv = reverse primer)



### Supplementary References

1. Edgar, R. C. MUSCLE: multiple sequence alignment with high accuracy and high throughput. *Nucleic Acids Research* **32**, 1792 (2004).
2. Licausi, f. *et al.* Oxygen sensing in plants is mediated by an N-end rule pathway for protein destabilization. *Nature* **479**, 419-422 (2011).
3. Hruz, T. *et al.* Genevestigator V3: a reference expression database for the meta-analysis of transcriptomes *Advances in Bioinformatics* **2008**, 1-6 (2008).
4. Licausi, F. *et al.*, HRE1 and HRE2, two hypoxia-inducible ethylene response factors, affect anaerobic responses in *Arabidopsis thaliana*. *The Plant Journal* **62**, 302 (2010)
5. Welsh, R. *et al.*, Transcription factor RAP2.2 and its interacting partner SINAT2: stable elements in the carotenogenesis of *Arabidopsis* leaves. *Plant Physiology* **145** (2007).
6. Karimi, M. *et al.*, Gateway<sup>TM</sup> vectors for *Agrobacterium*-mediated plant transformation. *Trends in Plant Science* **7**, 193-195 (2002)
7. Earley, K.W. *et al.*, Gateway-compatible vectors for plant functional genomics and proteomics. *The Plant Journal* **45**, 616-629(2006)
8. Licausi, F. *et al.* Hypoxia responsive gene expression is mediated by various subsets of transcription factors and miRNAs that are determined by the actual oxygen availability. *New Phytologist* **190**, 442-456 (2011).

9. Hellens, R. *et al.*, Transient expression vectors for functional genomics, quantification of promoter activity and RNA silencing in plants. *Plant methods* **1**,13-27 (2005)
10. Ehlert, A. *et al.*, Two-hybrid protein-protein interaction analysis in *Arabidopsis* protoplasts: establishment of a heterodimerisation map of group-C and S bZIP transcription factors. *The Plant Journal* **46**: 890-900 (2006).
